# Supplementary material for: Accurate spin–orbit and spin–other-orbit contributions to the g-tensor for transition metal containing systems
Source: Royal Society of Chemistry journal article supplement (doi:10.1039/c2cp41086a), 2012-01-01
Supplement: c2cp41086a.pdf [file c2cp41086a.pdf]

Supplementary Material for:  
Accurate spin-orbit and spin-other-orbit  
contributions to the g-tensor for transition metal  
containing systems

A. Van Yperen-De Deyne<sup>a</sup>, E. Pauwels<sup>a</sup>, V. Van Speybroeck<sup>a</sup> and M.  
Waroquier \* <sup>a</sup>

<sup>a</sup> Center for Molecular Modeling, Ghent University, Technologiepark 903, B-9052 Zwijnaarde, Belgium; E-mail: michel.waroquier@ugent.be

## S.1 RhC test molecule

### S.1 RhC test molecule

**Table 1** Gaussian 09 calculations of the g-tensor, using several basis sets and the PBE functional. In Gaussian 09 only the  $Z_{eff}$  method was used, so they can only be compared to the non-relativistic calculations of ORCA using the same spin-orbit approximation. All values are expressed as  $\Delta g = g_{ortho} - g_e$  in ppt.

|             | ORCA, $Z_{eff}$    |                   | G09, $Z_{eff}$     |                   |
|-------------|--------------------|-------------------|--------------------|-------------------|
|             | $\Delta g_{ortho}$ | $\Delta g_{para}$ | $\Delta g_{ortho}$ | $\Delta g_{para}$ |
| VDZ         | 111.73             | 0.21              | 108.1              | 0.21              |
| VDZ, 2df    | 91.89              | 0.22              | 91.85              | 0.22              |
| VDZ, 2df, p | 96.27              | 0.22              | 95.76              | 0.22              |
| VDZ, ppp, p | 94.03              | 0.22              | 93.62              | 0.22              |
| TZV         | 122.04             | 0.20              | 118.84             | 0.20              |
| TZV, 2df    | 104.28             | 0.21              | 104.32             | 0.21              |
| TZV, 2df, p | 106.09             | 0.22              | 105.98             | 0.22              |
| TZV, ppp, p | 103.08             | 0.22              | 103.00             | 0.22              |
| exp         | 51.78              | 1.58              | 51.78              | 1.58              |

**Table 2** GIPAW results of g-tensor calculation in function of the box size (in Bohr). All values are expressed as  $\Delta g = g_{ortho} - g_e$  in ppt.

| Box Size | $V_{eff}, PM$      |                   |
|----------|--------------------|-------------------|
|          | $\Delta g_{ortho}$ | $\Delta g_{para}$ |
| 5        | -8.76              | -47.01            |
| 10       | 40.07              | -0.23             |
| 15       | 43.15              | -0.11             |
| 15       | 43.15              | -0.11             |
| 20       | 48.67              | -0.10             |
| 25       | 51.68              | -0.10             |
| 30       | 53.22              | -0.11             |
| 35       | 54.06              | -0.11             |
| exp      | 51.78              | 1.58              |

## S.2 Doublet Molecules

| Molecule | d (Å) | Molecule | d (Å) |
|----------|-------|----------|-------|
| RhC      | 1.613 | ZnAg     | 2.550 |
| BO       | 1.204 | YO       | 1.788 |
| BS       | 1.609 | PdH      | 1.529 |
| AlO      | 1.618 | CdH      | 1.781 |
| GaO      | 1.744 | CdF      | 2.014 |
| ScO      | 1.668 | CdAg     | 2.727 |
| ZnH      | 1.595 | InO      | 1.875 |
| ZnF      | 1.799 |          |       |

**Table 3** Internuclear distances  $d$  of the diatomic spin-1/2 molecules as reported by P. Belanzoni, E. van Lenthe and E. J. Baerends, J. Chem. Phys., 2001, **114**, 4421-4433

## S.2 Doublet Molecules

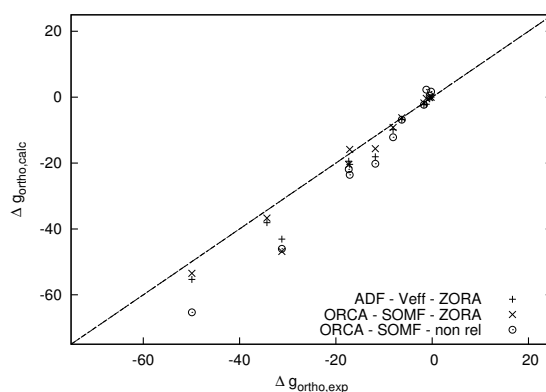

**Figure 1** Correlation diagram between  $\Delta g_{ortho,exp}$  and  $\Delta g_{ortho,calc}$  (y-axis) for several doublet molecules. Results of SOMF (with and without ZORA) and ADF (two-component method) are presented. For all calculations a triple- $\zeta$  quality basis set with polarization functions (Ahlichs 2df if possible) was used.

## S.3 High Spin Molecules

### S.3 High Spin Molecules

---

| Molecule                            | d (Å) | Molecule                            | d (Å) |
|-------------------------------------|-------|-------------------------------------|-------|
| <i>B</i> <sub>2</sub>               | 1.618 | <i>CrN</i>                          | 1.556 |
| <i>NH</i>                           | 1.053 | <i>Ge</i> <sub>2</sub> <sup>+</sup> | 2.461 |
| <i>NF</i>                           | 1.343 | <i>GaAs</i> <sup>+</sup>            | 2.744 |
| <i>NCl</i>                          | 1.643 | <i>YB</i> <sup>+</sup>              | 2.263 |
| <i>NBr</i>                          | 1.808 | <i>YAl</i> <sup>+</sup>             | 2.816 |
| <i>NI</i>                           | 2.007 | <i>ZrV</i>                          | 2.076 |
| <i>O</i> <sub>2</sub>               | 1.235 | <i>MoN</i>                          | 1.659 |
| <i>PH</i>                           | 1.453 | <i>NbO</i>                          | 1.714 |
| <i>SeO</i>                          | 1.677 | <i>TiNb</i>                         | 2.046 |
| <i>SO</i>                           | 1.518 | <i>ZrNb</i>                         | 2.245 |
| <i>S</i> <sub>2</sub>               | 1.931 | <i>CrF</i>                          | 1.784 |
| <i>BC</i>                           | 1.496 | <i>CrAg</i>                         | 2.554 |
| <i>C</i> <sub>2</sub> <sup>+</sup>  | 1.418 | <i>MnO</i>                          | 1.629 |
| <i>AlC</i>                          | 1.986 | <i>MnS</i>                          | 2.043 |
| <i>SiB</i>                          | 1.935 | <i>MnH</i>                          | 1.710 |
| <i>SiAl</i>                         | 2.459 | <i>MnF</i>                          | 1.833 |
| <i>Si</i> <sub>2</sub> <sup>+</sup> | 2.327 | <i>MnCl</i>                         | 2.241 |
| <i>VO</i>                           | 1.597 | <i>MnBr</i>                         | 2.395 |
| <i>TiV</i>                          | 1.835 | <i>MnAg</i>                         | 2.539 |
| <i>V</i> <sub>2</sub> <sup>+</sup>  | 1.741 |                                     |       |

**Table 4** Internuclear distances *d* of the diatomic high spin molecules as used by S. Pathkovskii and T. Ziegler, J. Phys. Chem. A, 2001, **105**, 5490-5497
